# Supplementary material for: Analysis of non-coding RNAs in Methylorubrum extorquens reveals a novel small RNA specific to Methylobacteriaceae
Source: bioRxiv or medRxiv preprint supplement (doi:10.1101/2022.01.24.477521), 2022-01-24
Supplement: Supplementary file [file media-1.pdf]

Supplementary material

**Supplementary material for: Analysis of non-coding RNAs in *Methylobacterium extorquens* reveals a novel small RNA specific to Methylobacteriaceae**

Emilie Boutet<sup>a</sup>, Samia Djerroud<sup>a</sup>, Katia Smail<sup>a</sup>, Marie-Josée Lorain<sup>b</sup>, Meiqun Wu<sup>b</sup>,  
Martin Lamarche<sup>a,b</sup>, Roqaya Imane<sup>a</sup>, Carlos Miguez<sup>b</sup> and Jonathan Perreault<sup>\*a</sup>

<sup>a</sup> INRS - Centre Armand-Frappier Santé Biotechnologie, 531 boulevard des Prairies,  
Laval, QC, H7V 1B7, Canada,

<sup>b</sup> National Research Council Canada, 6100 Royalmount, Montréal, Québec, Canada,  
H4P-2R2.

Corresponding author: [Jonathan.perreault@inrs.ca](mailto:Jonathan.perreault@inrs.ca), 531 des Prairies Blvd, Laval, Quebec,  
H7V 1B7, 450-687-4411

**Analysis of non-coding RNAs in *Methylorubrum extorquens* reveals a novel small RNA specific to Methylobacteriaceae**

Table of content

|                                                                                                |    |
|------------------------------------------------------------------------------------------------|----|
| Tables .....                                                                                   | 3  |
| Table S1. Probes for candidates tested by Northern blot analysis .....                         | 3  |
| Table S2. Intergenic regions containing Met2624.....                                           | 4  |
| Table S3. Intergenic regions containing Met1153.....                                           | 9  |
| Table S4. RNACode results for intergenic region containing Met2624. ....                       | 11 |
| Table S5: Optical density at which samples were taken for RNA-seq.....                         | 11 |
| Figures .....                                                                                  | 12 |
| Figure S1. Size estimation of candidate sRNA2624 based on known RNA.....                       | 12 |
| Figure S2. Expression of sRNA2624 over the growth of <i>M. extorquens</i> .....                | 13 |
| Figure S3. Genomic context of Met2624. ....                                                    | 13 |
| Figure S4. RNAz results for intergenic regions containing Met2624.....                         | 14 |
| Figure S5. Secondary structure for Met1153 .....                                               | 14 |
| Figure S6. Alternative secondary structure for Met2624 .....                                   | 15 |
| Figure S7. Growth curve of <i>M. extorquens</i> ATCC55366 for Northern Blot Analysis.<br>..... | 15 |

## Supplementary material

## Tables

Table S1. Probes for candidates tested by Northern blot analysis

| ID   | Start   | End     | Size | Strand | Probe                                               |
|------|---------|---------|------|--------|-----------------------------------------------------|
| 426  | 51119   | 51301   | 182  | +      | GGCAGCCCAGCCTGCTGCTCCTTCAGGATGCCGATGATCTGCTCTTCGCT  |
| 432  | 80737   | 80895   | 158  | +      | CGGGCTCACGGTCTTTGGCCGTGAACCCTAAAAGTGCGGCGATATGAACC  |
| 609  | 636257  | 636362  | 105  | +      | GAAGGATCCTCCAGGGATCGCGCGGGATCTGGACGATCCTTCGTGGCCGC  |
| 1113 | 2218259 | 2218369 | 110  | +      | TGTGCTGATGTTTCCGCTTCTGCGGATCACCGTCACGAAAAACCCGAGCGG |
| 1153 | 2388747 | 2388799 | 52   | +      | TCTGGAGCCCTCCTTCGAGGCCTCCGCTTCGCTCCGGCACCTCAGGATGA  |
| 1175 | 2436125 | 2436237 | 112  | +      | AGCTCGTCAGGCTCATAACCTGAAGGTCGCTGGTTCAAATCCAGCCCCCG  |
| 1348 | 3229332 | 3229428 | 96   | +      | AAGCTCGGCCGTATGTGAACCTTGGCCGTTCCGGCAGCGTTTCCCGAATGG |
| 1627 | 4198109 | 4198315 | 206  | +      | CACGCGGGGAGAGGGTTCGCGACGACCACGG                     |
| 1679 | 4343857 | 4343949 | 92   | +      | CGGAACTTGCAAACCATCTGCAAGCCGTAACCCCGACGCCGAAGGCATCA  |
| 1752 | 4567059 | 4567168 | 109  | +      | CGCGACGACCGGATGCGCCCTCGACGGGCGCTTCCGCCGCCGGCACGATC  |
| 1776 | 4678233 | 4678297 | 64   | +      | GCCTGCGAGCGCCCTGCCGGGCACTTCACGTGGGCCATCCGCCGGAACGG  |
| 1819 | 4874156 | 4874225 | 69   | +      | GTGGGATCGCGTTGGCCGCTATCCCGCGCT                      |
| 1969 | 5367912 | 5368067 | 155  | +      | CGTCCGGTGTTCGTGGCGGGCCACTCAGTCCAAGACCGAACGGGTTCTCA  |
| 2036 | 51121   | 51275   | 154  | -      | AGACGGACGATGAAGAAGAGCCGGTTTAGCGAAGAGCAGATCATCGGCAT  |
| 2038 | 54339   | 54419   | 80   | -      | TCTGATCGTTGCCTCGCGTGCTAGACCCATGCGCGGGTCGCCGCAATGCG  |
| 2039 | 57158   | 57258   | 100  | -      | TAGCGCCGCCGAGGCGCGCGGGCAAGAGCCCGTTCCGGCCACGCCGGTA   |
| 2043 | 80757   | 80895   | 138  | -      | AATGCCTTCGGGCTCACGGTCTTTGGCCGTGAACCCTAAAAGTGCGGCGA  |
| 2185 | 636269  | 636362  | 93   | -      | AGCGGCCACGAAGGATCGTCCAGATCCCGCGCGATCCCTGGAGGATCCTTC |
| 2624 | 2125529 | 2125634 | 105  | -      | AACGGCGCAGAGAAGTGGTCCGCACCGCCCGTCACTGCCGGCCCCGCCA   |
| 2674 | 2388747 | 2388799 | 52   | -      | CCTCATCCTGAGGTGCCGGAGCGAAGCGGAGGCCTCGAAGGAGGGCTCCA  |
| 3211 | 4753719 | 4753781 | 62   | -      | GACACCTTCAACTAGAAGGCGTCGCCGGACTCGATCCGGTGAGAACG GG  |
| 3355 | 5367928 | 5368087 | 159  | -      | TGAGAACCCGTTCCGGTCTTGACTGAGTGGCCCCGCCAACACCCGGACG   |

**Table S2. Intergenic regions containing Met2624.**

More conserved region containing Met2624 based on alignment results of all intergenic regions are italicized.

| Hits from Genomic data                                                                                                                                                                                                                                                                                                                                                                                                                                                                                                                                                                                                                                                                                                                                                                                                                                                                                                                                                                                                                                                                                                                                                                                                                                                                                                                                                                                                                                                                                                                                                                                                                                                                                                                                                                                                                                                                                                                                                                                                                                                                                                                                                                                                                                                                                                                                                                                                                                                                                                                                                                                                                                                                                                                                                                                                                                                                                                                                                                                                                                                                                                                                                                                                                                                                                                                                                                                                                                                                                                                                                                                                                                                                                                                                                                                                                                                                                                                                                                                                                                                                                                                                                                                                                                                                                                                                                                                                                                                                                                                                                                                                                                                                                                                             |
|----------------------------------------------------------------------------------------------------------------------------------------------------------------------------------------------------------------------------------------------------------------------------------------------------------------------------------------------------------------------------------------------------------------------------------------------------------------------------------------------------------------------------------------------------------------------------------------------------------------------------------------------------------------------------------------------------------------------------------------------------------------------------------------------------------------------------------------------------------------------------------------------------------------------------------------------------------------------------------------------------------------------------------------------------------------------------------------------------------------------------------------------------------------------------------------------------------------------------------------------------------------------------------------------------------------------------------------------------------------------------------------------------------------------------------------------------------------------------------------------------------------------------------------------------------------------------------------------------------------------------------------------------------------------------------------------------------------------------------------------------------------------------------------------------------------------------------------------------------------------------------------------------------------------------------------------------------------------------------------------------------------------------------------------------------------------------------------------------------------------------------------------------------------------------------------------------------------------------------------------------------------------------------------------------------------------------------------------------------------------------------------------------------------------------------------------------------------------------------------------------------------------------------------------------------------------------------------------------------------------------------------------------------------------------------------------------------------------------------------------------------------------------------------------------------------------------------------------------------------------------------------------------------------------------------------------------------------------------------------------------------------------------------------------------------------------------------------------------------------------------------------------------------------------------------------------------------------------------------------------------------------------------------------------------------------------------------------------------------------------------------------------------------------------------------------------------------------------------------------------------------------------------------------------------------------------------------------------------------------------------------------------------------------------------------------------------------------------------------------------------------------------------------------------------------------------------------------------------------------------------------------------------------------------------------------------------------------------------------------------------------------------------------------------------------------------------------------------------------------------------------------------------------------------------------------------------------------------------------------------------------------------------------------------------------------------------------------------------------------------------------------------------------------------------------------------------------------------------------------------------------------------------------------------------------------------------------------------------------------------------------------------------------------------------------------------------------------------------------------------------|
| <p>&gt;<i>Methylobacterium extorquens</i> strain TK0001<br/> ACAGGGCCTCGCATCAAAGCTCCCAGATCACCAGATCGCTGTCCCTCGGGGCACGGCCGCGTGGCGGGA<br/> GTTCTGTGAGAAGCAGGTCAGCCGAGGATCGGGAAGGGCCGGAACCCACATCGGTGGCAGGGGAGC<br/> GGCGTACGGCACGGTTGCCGTCCGGCGGCGGGGCCTCTACATCGGCCCTCCCCGCGGCCGATGCGC<br/> <u>CTGACGGTTTCGCGAGCCCTCTCGGGCCTGCGTGGTGGCGGGGCCGGCAGTGACGGGGCGGTGCGG</u><br/> <u>ACCAGTTCTCTGCGCCGTTCTGTGACGCTCAGTGGGCCGAGCGGCTGCAGGTGCGTCGGGAGCGCG</u><br/> <u>GGGAACAGGAACCGCGACCCCGGCGCAAGGCCACCTATCCGAATTCCCTCGACCGAATTCCTTAG</u><br/> <u>CCCCTGGCCGACGCATCCGGTCCGGGGCCGGGCCTGGGATACAGCGCGAGAAGCGTTAACGGTC</u><br/> <u>TTTCTCAAGGAAAGCGAACCAGGTAGCAGGCGATTTATCGCAGATTGTGCGCGAAAGGTGCGACCA</u></p> <p>&gt;<i>Methylobacterium zatmanii</i> strain PSBB041<br/> ACAGGGCCTCGCATCAAAGCTCCCAGATCACCAGATCGCTGTCCCTCGGGGCACGGCCGCGTGGCGGGA<br/> GTTCTGTGAGAAGCAGGTCAGCCGAGGATCGGGAAGGGCCGGAACCCACATCGGTGGCAGGGGAGC<br/> GGCGTACGGCACGGTTGCCGTCCGGCGGCGGGGCCTCTACATCGGCCCTCCCCGCGGCCGATGCGC<br/> <u>CTGACGGTTTCGCGAGCCCTCTCGGGCCTGCGTGGTGGCGGGGCCGGCAGTGACGGGGCGGTGCGG</u><br/> <u>ACCAGTTCTCTGCGCCGTTCTGTGACGCTCAGTGGGCCGAGCGGCTGCAGGTGCGTCGGGAGCGCG</u><br/> <u>GGGAACAGGAACCGCGACCCCGGCGCAAGGCCACCTATCCGAATTCCCTCGACCGAATTCCTTAG</u><br/> <u>CCCCTGGCCGACGCATCCGGTCCGGGGCCGGGCCTGGGATACAGCGCGAGAAGCGTTAACGGTC</u><br/> <u>TTTCTCAAGGAAAGCGAACCAGGTAGCAGGCGATTTATCGCAGATTGTGCGCGAAAGGTGCGACCA</u></p> <p>&gt;<i>Methylobacterium extorquens</i> strain PSBB040<br/> ACAGGGCCTCGCATCAAAGCTCCCAGATCACCAGATCGCTGTCCCTCGGGGCACGGCCGCGTGGCGGGA<br/> GTTCTGTGAGAAGCAGGTCAGCCGAGGATCGGGAAGGGCCGGAACCCACATCGGTGGCAGGGGAGC<br/> GGCGTACGGCACGGTTGCCGTCCGGCGGCGGGGCCTCTACATCGGCCCTCCCCGCGGCCGATGCGC<br/> <u>CTGACGGTTTCGCGAGCCCTCTCGGGCCTGCGTGGTGGCGGGGCCGGCAGTGACGGGGCGGTGCGG</u><br/> <u>ACCAGTTCTCTGCGCCGTTCTGTGACGCTCAGTGGGCCGAGCGGCTGCAGGTGCGTCGGGAGCGCG</u><br/> <u>GGGAACAGGAACCGCGACCCCGGCGCAAGGCCACCTATCCGAATTCCCTCGACCGAATTCCTTAG</u><br/> <u>CCCCTGGCCGACGCATCCGGTCCGGGGCCGGGCCTGGGATACAGCGCGAGAAGCGTTAACGGTC</u><br/> <u>TTTCTCAAGGAAAGCGAACCAGGTGGCAGGCGATTTATCGCAGATTGTGCGCGAAAGGTAGCACCA</u></p> <p>&gt;<i>Methylobacterium</i> sp. AMS5<br/> GGCGGTCTTCGGGGCAAAGCGTCGCCCCAGGGCAGCGGCGTACGGCACGGTTGCCGTCCGGCGG<br/> CGCAGGCCTCTACATCGGCCCTCCCCGCGGCCGATGCGCCCGATGGTTTCGCGAGCCCTCTCGGGCC<br/> <u>TGCGTGGTGGCGGGGCCGGCAGTGACGGGGCGGTGCGGACCAGTTCTCTGCGCCGTTCTGTGACGC</u><br/> <u>TCAGTGGGCCGAGCGGCTGCAGGTGCGTCCGGGAGCGCGGGGAACAGGAACCGCGACCCCGGCGCAA</u><br/> <u>GGCCACCTACC</u><u>TGAATTCCTCGCCCAATTCCTTGGCCCCAGACCGGCACGCGTCCGGTCCGGG</u><br/> <u>GCCGGCCTGGGATATCGGCGAGCGAAGCGTTAACGGTCTTTCTCAAGGAAAGCGAACCAGCTCGT</u><br/> <u>GGCGATCTATCGCAGACCATCGCTAAAGGTGCGACCA</u></p> <p>&gt;<i>Methylobacterium extorquens</i> strain DM4<br/> ACACGGCCTCGCATCAAAGCTCCCAGATCACCAGATCGCTGTCCCTCGGGGCACGGCCGCGTGGCGGGA<br/> GTTCTGTGAGAAGCAGGTCAGCCGAGGGCCGCGCAAGGCTGGAACGTACATCGGTGGCGGGGGAGC<br/> GGCGTACGGCACGGTTGCCGTCCGGCGGCGGGGCCTCTACATCGGCCCTCCCCGCGGCCGATGCGC<br/> <u>CTGACGGTTTCGCGAGCCCTCTCGGGCCTGCGTGGTGGCGGGGCCGGCAGTGACGGGGCGGTGCGG</u><br/> <u>ACCAGTTCTCTGCGCCGTTCTGTGACGCTCAGTGGGCCGAGCGGCTGCAGGTGCGTCGGGAGCGCG</u><br/> <u>GGGAACAGGAACCGCGACCCCGGCGCAAGGCCACCTATCCGAATTCCCTCGACCGAATTCCTTAG</u><br/> <u>CCCCAGACCGGCACGCATCCGGTCCGGGGCCGGGCCTGGGTACAGCGCGAGAAGCGTTAACGGTCT</u><br/> <u>TTTCTCAAGGAAAGCGAACCAGGTGGCAGGCGATTTATCGCAGATTGTGCGCGAAAGGTGCGACCA</u></p> <p>&gt;<i>Methylobacterium extorquens</i> AM1<br/> ACAGGGCCTCGCATCAAAGCTCCCAGATCACCAGATCGCTGTCCCTCGGGGCACGGCCAGGTGGCGGG<br/> AGTTCTGTGAGAAGCAGGTCAGCCGAGGGCCGCGCAAGGCCGGAACCCACATCGGTGGCGGGGGAG<br/> CGGCGTACGGCACGGTTGCCGTCCGGCGGCGGGGCCTCTACATCGGCCCTCCCCGCGGCCGATGCG<br/> <u>CCTGACGGTTTCGCGAGCCCTCTCGGGCCTGCGTGGTGGCGGGGCCGGCAGTGACGGGGCGGTGCGG</u><br/> <u>GACCAGTTCTCTGCGCCGTTCTGTGACGCTCAGTGGGCCGAGCGGCTGCAGGTGCGTCGGGAGCGC</u><br/> <u>GGGAACAGGAACCGCGACCCCGGCGCAAGGCCACCTATCCGAATTCCCTCGACCGAATTCCTTAG</u><br/> <u>GCCCCAGACCGGCACGCATCCGGTCCGGGGCCGGGCCTGGGATACAGCGCGAGAAGCGTTAACGGT</u><br/> <u>CTTTCTCAAGGAAAGCGAACCAGGTGGCAGGCGATTTATCGCATATTGTGCGCGAAAGGTGCGACCA</u></p> <p>&gt;<i>Methylobacterium extorquens</i> CM4<br/> ACAGGGCCTCACAAAGGCTCCCAGATCACCAGATCGCTGTCCCTCGGGGCACGGCCGCGTGGCGGG<br/> AGTTCTGTGAGAAGCAGGTCACCCGAGGACCGGCGAGGGCCAGACCCACGTGCGGCGGGGGAG<br/> CGGCGTACGGCACGGTTGCCGTCCGGCGGCGGGGCCTCTACATCGGCCCTCCCCGCGGCCGATGCG<br/> <u>CCTGACGGTTTCGCGAGCCCTCTCGGGCCTGCGTGGTGGCGGGGCCGGCAGTGACGGGGCGGTGCGG</u><br/> <u>GACCAGTTCTCTGCGCCGTTCTGTGACGCTCAGTGGGCCGAGCGGCTGCAGGTGCGTCGGGAGCGC</u><br/> <u>GGGAACAGGAACCGCGACCCCGGCGCAAGGCCACCTATCCGAATTCCCTCGACCGAATTCCTTAG</u><br/> <u>GCCCCAGACCGGCACGCATCCGGTCCGGGGCCGGGCCTGGGATACAGCGCGAGAAGCGTTAACGGT</u><br/> <u>CTTTCTCAAGGAAAGCGAACCAGGTGGCAGGCGATTTATCGCATATTGTGCGCGAAAGGTGCGACCA</u></p> |

## Supplementary material

ATGCATCCGGTCCGGGGCCGGGCTGGGATACAGCGCGAGAAGCGTTAACGGTCTTCTCAAGGGA  
AAGCGAACCGGTGGCAGGCGATTTATCGCAGATTGTGCGCCGAAAGGTCGACCA

>*Methylobacterium* sp. N191

AGCGCACGTGGCCTTGCCTGCGCGGAAGGGCAGCGGCGTACGGCGCGGTTGCCCGCGGGCGG  
CGGACCTCTACATCGGCCCTCCCCGCGGCCGATGCGCCTGATGGTTTCGCGAGCCCTCTCGGGCCTG  
CGTGGCGGGCGGGCCGGCAGTGACGGGGCGGTGCGGACCAGTTCTCTGCGCCGTTCTGTGACGCTC  
AGTGGGCCGAGCGGCTGCAGGTGTGTCGGAAGCGCGGGGAACAGGAACCGCGATTTTCGGCGCATGG  
CCCACCCGATTTCCAGCCTTGCCGATCCGGGCTCCAGCCCGGATCGGGAACGGGTTCTGGGATGGC  
GCCAGAGCCGTTAACGGTCTTTCGCAAGGGAAAACCAACCAGACGCATGCAACCATTTCTGCGCTTTG  
TCTCAGAAAGGTTGCACAA

>*Methylobacterium* sp. CLZ

AGCGCACGTGGCCTTGCCTGCGCGGAAGGGCAGCGGCGTACGGCGCGGTTGCCCGCGGGCGG  
CGGACCTCTACATCGGCCCTCCCCGCGGCCGATGCGCCTGATGGTTTCGCGAGCCCTCTCGGGCCTG  
CGTGGCGGGCGGGCCGGCAGTGACGGGGCGGTGCGGACCAGTTCTCTGCGCCGTTCTGTGACGCTC  
AGTGGGCCGAGCGGCTGCAGGTGTGTCGGAAGCGCGGGGAACAGGAACCGCGATTTTCGGCGCATGG  
CCCACCCGATTTCCAGCCTTGCCGATCCGGGCTCCAGCCCGGATCGGGAACGGGTTCTGGGATGGC  
GCCAGAGCCGTTAACGGTCTTTCGCAAGGGAAAACCAACCAGACGCATGCAACCATTTCTGCGCTTTG  
TCTCAGAAAGGTTGCACAA

>*Methylobacterium* sp. YC-XJ1

CTGGAAGAGGCCTGCCCGCATCCAGCGCTTCTGCGGCTCGCTGCGGTAGGCGGGCGCCACGGGGC  
AAAGCGTCGCCGAAGGGGCAGCGGCGTACGGCGCGGTTGCCCGCGGGCGCACAGACCTCTACATC  
GGCCCTCCCCGCGGCCGATGCGCCTGACGGTTTCGCGAGCCCTCTCGGGCCTGCGTGGCGGGCGGGC  
CGGCAGTGACGGGGCGGTGCGGACCAGTTCTCTGCGCCGTTCTGTGACGCTCAGTGGGCCGAGCGG  
CTGCAGGTGCGTCGGGAGCGCGGGGAACAGGAACCGCGACCCCGGCGCAAGGCCACACGATTCT  
GCGCTCTCCGATCCGGCCTCGAGCCCGGATCGGGGGCTGCCTTCCGGGCGCCGCGGAGAACCGTTA  
AGGTCTTTCGCAAGGGAAAACCAACCAGGCTCCATGCAACCTTTCGCACGTTGTCTCGAAAAGGTTG  
CACAA

>*Methylobacterium* sp. DM1

AGCCGCACGTGGCCTTGCCTGCGCGGAAGGGCAGCGGCGTACGGCGCGGTTGCTCGCGGGCGG  
CGGACCTCTACATCGGCCCTCCCCGCGGCCGATGCGCCTGATGGTTTCGCGAGCCCTCTCGGGCCTG  
CGTGGCGGGCGGGCCGGCAGTGACGGGGCGGTGCGGACCAGTTCTCTGCGCCGTTCTGTGACGCTC  
AGTGGGCCGAGCGGCTGCAGGTGTGTCGGAAGCGCGGGGAACAGGAACCGCGATTTTCGGCGCATGG  
CCCACCCGATTTCCAGCCTCGCCGATCCGGGCTCCAGCCCGGATCGGGAACGGGTTCCCGGGTTGG  
CGCCAGATCCGTTAACGGTCTTTCGCAAGGGAAAACCAACCAGACGCATGCAACCATTTTCGCGCTT  
GTCTCAGAAAGGTTGCACAA

>*Methylobacterium* sp. DM1

AGCCGCACGTGGCCTTGCCTGCGCGGAAGGGCAGCGGCGTACGGCGCGGTTGCTCGCGGGCGG  
CGGACCTCTACATCGGCCCTCCCCGCGGCCGATGCGCCTGATGGTTTCGCGAGCCCTCTCGGGCCTG  
CGTGGCGGGCGGGCCGGCAGTGACGGGGCGGTGCGGACCAGTTCTCTGCGCCGTTCTGTGACGCTC  
AGTGGGCCGAGCGGCTGCAGGTGTGTCGGAAGCGCGGGGAACAGGAACCGCGATTTTCGGCGCATGG  
CCCACCCGATTTCCAGCCTCGCCGATCCGGGCTCCAGCCCGGATCGGGAACGGGTTCCCGGGTTGG  
CGCCAGATCCGTTAACGGTCTTTCGCAAGGGAAAACCAACCAGACGCATGCAACCATTTTCGCGCTT  
GTCTCAGAAAGGTTGCACAA

>*Methylobacterium* sp. DM1

AGCCGCACGTGGCCTTGCCTGCGCGGAAGGGCAGCGGCGTACGGCGCGGTTGCTCGCGGGCGG  
CGGACCTCTACATCGGCCCTCCCCGCGGCCGATGCGCCTGATGGTTTCGCGAGCCCTCTCGGGCCTG  
CGTGGCGGGCGGGCCGGCAGTGACGGGGCGGTGCGGACCAGTTCTCTGCGCCGTTCTGTGACGCTC  
AGTGGGCCGAGCGGCTGCAGGTGTGTCGGAAGCGCGGGGAACAGGAACCGCGATTTTCGGCGCATGG  
CCCACCCGATTTCCAGCCTCGCCGATCCGGGCTCCAGCCCGGATCGGGAACGGGTTCCCGGGTTGG  
CGCCAGATCCGTTAACGGTCTTTCGCAAGGGAAAACCAACCAGACGCATGCAACCATTTTCGCGCTT  
GTCTCAGAAAGGTTGCACAA

>*Methylobacterium* sp. DM1

AGCCGCACGTGGCCTTGCCTGCGCGGAAGGGCAGCGGCGTACGGCGCGGTTGCTCGCGGGCGG  
CGGACCTCTACATCGGCCCTCCCCGCGGCCGATGCGCCTGATGGTTTCGCGAGCCCTCTCGGGCCTG  
CGTGGCGGGCGGGCCGGCAGTGACGGGGCGGTGCGGACCAGTTCTCTGCGCCGTTCTGTGACGCTC  
AGTGGGCCGAGCGGCTGCAGGTGTGTCGGAAGCGCGGGGAACAGGAACCGCGATTTTCGGCGCATGG  
CCCACCCGATTTCCAGCCTCGCCGATCCGGGCTCCAGCCCGGATCGGGAACGGGTTCCCGGGTTGG  
CGCCAGATCCGTTAACGGTCTTTCGCAAGGGAAAACCAACCAGGCTCCATGCAACCTTTCGCACGTT  
TGTCTCGAAAAGGTTGCACAA

>*Methylobacterium* sp. DM1

AGCCGCACGTGGCCTTGCCTGCGCGGAAGGGCAGCGGCGTACGGCGCGGTTGCTCGCGGGCGG  
CGGACCTCTACATCGGCCCTCCCCGCGGCCGATGCGCCTGATGGTTTCGCGAGCCCTCTCGGGCCTG  
CGTGGCGGGCGGGCCGGCAGTGACGGGGCGGTGCGGACCAGTTCTCTGCGCCGTTCTGTGACGCTC  
AGTGGGCCGAGCGGCTGCAGGTGTGTCGGAAGCGCGGGGAACAGGAACCGCGATTTTCGGCGCATGG  
CCCACCCGATTTCCAGCCTCGCCGATCCGGGCTCCAGCCCGGATCGGGAACGGGTTCCCGGGTTGG  
CGCCAGATCCGTTAACGGTCTTTCGCAAGGGAAAACCAACCAGGCTCCATGCAACCTTTCGCACGTT  
TGTCTCGAAAAGGTTGCACAA

>*Methylobacterium* sp. DM1

ATCGCCGCGGGTGGGCGCAATCGGCCCGCGCTCTGTTGCCGGCTCGGCTGCCACCCTCTACACGGAC

## Supplementary material

GGTCCCCGCGGCCGATGCGCCTGAAGGTTTCGCGAGCCCGCTCGGGCCTGCATGGTAGCGGGGCGCG  
CAGTGACGGGGTGGTCCGGACCAGTTCTCTGGGCCAATCCTGTGAGGGCTCAGTGGGCCGAGTCGCTG  
CAGGAGTGTCCGGAGCGCGGGGAACAGGAACCGCGGGCTCGGCCGAAGGCCACATAGAATTACCC  
CGATCCGGGACTGGCGCCGATCCGGCGCCCTGCCCGATCCGGGACAGCCCGGTTCGGGCGCGG  
TTGCAGCTTCGTTACGCTCCGGCGGATGATACGACGAGGCCGGGGATCCGGTCCGGCGTAACCGC  
GTTCTTTCGGGCTGACGACCA

> *Methylobacterium mesophilicum* SR1.6/6

ATCGCCGCGGGGTGCGGGGAACGGCTCCGCCTCGGTTGCCGGCTCGGCTGTCACCCTTACACGGG  
CTGTCCCCAGCGGCCGATGCGCCTGAAGGTTTCGCGAGCCCGCTCGGGCCTGCATGGTAGCGGGGTC  
GGCAGTGACGGGGTGGTCCGGACCAGTTCTCTGGGCCGTTCTGTGAGGGCTCAGTGGGCCGAGTTGC  
TGCAGGAGTGTCCGGCGCGGGGAACAGGAACCGCGGATCCGGCGCATGGCCACATCAATCTCC  
TTCCGAGATGGATCGATCCGCCCGCCGACCGTGCCTCCGACGGGTTCGGATGCCCGTTCGGGACA  
GGGCCGGCGCGCGGTTGCGGCTTCGTTACGCTCCCGCGGGATGATGCGGGAAGACCGGGGATC  
CGGTCTGCGTAACCGCGTTTCTCGGGCCTGACGATCA

> *Methylobacterium* sp. C1

CCTTACACGGGCTGTCCCAGCGGCCGATGCGCCTGAAGGTTTCGCGAGCCCGCTCGGGCCTGCAT  
GGCGCGGGGTTCGGCAGTGACGGGGCGGTCCGGACCAGTTCTCTGGACCCTTCTGTGAGGGCTCAGT  
GGCCGAGTTCGCTGCAGGAGTGTCCGGAGCGCGGGGAACAGGAACCGCGGGTCCGGCGCATGGCCC  
AC

> *Methylobacterium radiotolerans* JCM 2831

ATCGCCGCGGGGCCCGGAAACGGCCCCGCTCTGTTGCCGGCTCGGCTGTCACCCTTACACGGGC  
TGTCCCCAGCGGCCGATGCGCCTGAAGGTTTCGCGAGCCCGCTCGGGCCTGCATGGCGGGGGGTTCG  
GCAGTGACGGGGCGGTCCGGACCAGTTCTCTGGACCCTTCTGTGAGGGCTCAGTGGGCCGAGTCGCT  
GCAGGAGTGTCCGGAGCGCGGGGAACAGGAACCGCGGGTCCGGCGCATGGCCACATGATTTCCCG  
CCCGATCCCGCCCGCGGACTTGTTCGGGGCGCGGGGCCCTGCCCGTTCGGGACAGGGGCGGCCG  
GAGCCGTTGCGGCTTCGTTACGCTCCCGCGGATGATGCGTCCGGGCCGGGGATCCGGTTCGCGT  
AACCGGTTCTCTCGGGCCTGACGACCA

> *Methylobacterium* sp. XJLW

GGGCCCTCCGGGCGATCCTTCCCGGGCGCGGACCCCGTCCGCGCTCGGCGTGACGGGGCTCGCGCC  
CGCGCTTTGCCCGCGCTCTTGCCCGCGCTCTCGGGGGCGCCCTCCGGTTCGGCCGCGGGGCCCGCTG  
ATACGCTTCCCGCGGGCCGCGCGCGCGGATCGCCGCGGGCCACCGAAACGGTCCCGCCTCT  
GTTGCCGGCTCGGCTGTACCCTTACACGGGCTGTCCCAGCGGCCGATGCGCCTGAAGGTTTCGCG  
GAGCCGCTCGGCTGCATGGCAGCGGGGTCCGGCAGTGACGGGGCGGTCCGGACCAGTTCTCTGG  
ACCGTTCTGTGAGGCTCAGTGGGCCGAGTCGCTGCAGGAGTGTTCGGGAGCGCGGGGAACAGGAAC  
CGCGGGTTCGGCGCAAGGCCACAAGATTCCCCGTCGACCGAGCGCCGAGCCGTCCCGACGCGCCG  
GATCTGACCCGTTCCGGGACAGGGCCGAACGCGACGGTTGCGGCTTCGTTACGCTCGCGCGCGATG  
ATGCGTCCGGGCCGGGGATCCGGTTCGCGTAACCGGTTCTCTCGGGCCTGACGACCA

> *Methylobacterium phyllosphaerae* strain CBMB27

GGGCCCTCCGGGCGATCCTTCCCGGGCGCGGACCCCGTCCGCGCTCGGCGTGACGGGGCTCGCGCC  
CGCGCTTTGCCCGCGCTCTTGCCCGCGCTCTTGCCCGCGCTCTCGGGGGCGCCCTCCGGTTCGGCCG  
GCGCCCGCGCGCGCGCGGATCGCCGCGCGGGCCACCGAAACGGTCCCGCCTCTGTTGCCGGCTC  
GGCTGTCACCCTTACACGGGCTGTCCCAGCGGGCCGATGCGCCTGAAGGTTTCGCGAGCCCGCTCG  
GGCCTGCATGGCAGCGGGGTCCGCAGTGACGGGGCGGTCCGGACCAGTTCTCTGGACCCTTCTGTG  
AGGCTCAGTGGGCCGAGTCGCTGCAGGAGTGTTCGGGAGCGCGGGGAACAGGAACCGCGGGTTCGGC  
GCAAGGCCACAAGATTCCCCGTCGACCGAGCGCCGAGCCGTCCCGACGCGCGATCTGACCCGTT  
CCGGGACAGGCCCAACGCGACGGTTGCGGCTTCGTTACGCTCCCGCGGATGATGCGTCCGGGCC  
GGGATCCGGTTCGCGTAACCGGTTCTCTCGGGCCTGACGACCA

> *Methylobacterium oryzae* CBMB20

GGGCCCTCCGGGCGATCCTTCCCGGGCGCGGACCCCGTCCGCGCTCGGCGTGACGGGGCTCGCGCC  
CGCGCTTTGCCCGCGCTCTTGCCCGCGCTCTTGCCCGCGCTCTCGGGGGCGCCCTCCGGTTCGGCCG  
GGGGCCCGTATACGCTTCCCGCGGGCCGCGCGCGCGGATCGCCGCGCGGGCCACCGAAAC  
GGTCCCGCTCTGTTGCCGGCTCGGCTGTCACCCTTACACGGGCTGTCCCAGCGGCCGATGCGCCT  
GAAGGTTTCGCGAGCCCGCTCGGGCCTGCATGGCAGCGGGGTTCGGCAGTGACGGGGCGGTCCGGAC  
CAGTTCTCTGGACCCTTCTGTGAGGCTCAGTGGGCCGAGTCGCTGCAGGAGTGTTCGGGAGCGCGGG  
GAACAGGAACCGCGGGTTCGGCGCAAGGCCACAAGATTCCCCGTCGACCGAGCGCGGGAGCCGTC  
CCGACGCGCGATCTGACCCGTTCCGGGACAGGGCCGAACGCGACGGTTGCGGCTTCGTTACGCTC  
GCGCGGATGATGCGTCCGGGCCGGGGATCCGGTTCGCGTAACCGGTTCTCTCGGGCCTGACGAC  
CA

> *Methylobacterium radiodurans* strain 17Sr1-43

GGCCACGAGTTGTGACGCAGAGAGCATCACGGTTCGAACCGCCGAGCTTGTTTCCCCCGGTTATCGGG  
CCCTGAGATGGAGCCAGGATCGCCCGGTTGCTTGGCGCCCGCGCCCTTACATCGGCGGT  
CCCGCGCGGCTGACGCGCTGAAGGTTTCGCGAGCCCGCTCGGGCCGGCATGGTAGCGGGTCCGGCA  
GCGACGGGGCGGTCCGGACCAGTTCTCTGGGCCGCTCCCGTGAGACCCAGTGGGCCGGGGCGGCTGC  
AGGGGTGTTCGGAGGGCGGGGAACAGGAACCGCGGATCCGGCGCATGGCCACAACCTTCTCCGGG  
CTCGTCCATGATCTGGCGGTGATCTGACCCGCGCCTGAGCTGGCCCGTTCGGGACGAAGACACCG  
GCAGGTTCTGTGGCTTCGTTACGCCCGCCGTAAGGATAAGGACGGGCCGGGAACCGGCCGCGT  
GCCACCGGTTCTTCCGGCCTGACGACCA

## Supplementary material

>*Methylobacterium* sp. WL1

ATCGCCGCGGGGGCGCCGAATCGGCCGTCGCTCTGTTGCCGGCTTGGCTGCCATTCTCTACACGAGC  
GGTCTCCCGCGCCGATGCGCCTGAAGGTTTCGCGAGCCCCGCTCGGGCCTGCATGGTAGCGGGGCCG  
GCAGTGACGGGGTGGTTCGACCAGTCTCTGGACCAATCCTGTGAGGCTCAGTGGGCCGAGTCGCT  
GCAGGAGTGTGCGGAGCGCGGGGAACAGGAACCCGCGGGCTCGGGCGCAAGGCCACAAAGATTTCCG  
TTTCGCTATCGGCGTCGACAGGTGCCCGCGGGCGGCATCCGGGCAGCCCCGATCCGACGCTCGCCCGAT  
CCGGCGCCCTGCCCCGATCCGGGACGATGCAACGCCAGGCGGTTGCAGCTTCGTTACGCTCCCGCG  
CGATGATGCGATAGGGCCGGGATCCGGTCCGGCGTAACCCGCTTCTTCGGGCCTGACCACCA

>*Methylobacterium nodulans* ORS 2060

AAGTAGCCCCGCCGCTTTCGACGCAGCCGAGCGCACCAATTCCTGTTGCCCGCCGGCGTGGTCTG  
CTACACGGGAGTCTGACCGCCAGCGCCCGGAGGCTTCCGGAACCCGCTCGGGCTGCGCGGTGG  
AAGGGCCGGCGATGACGGGATGGGGCGGACCAGTTCTCTGCAACCCATTCTGTGAGGCTCAGTGG  
GCCGAGTAGTCGCAGGAGCGTCAGTGGTTCGGGGAAACAGGAACCCGCGACCCCTGGCGCATGGCCAC  
CAGGATTACCCGCATGAGCCGGCGCGGCATCGGGAGACGCCGCATCCGCCTTTCGAAGCAAT  
CTGCCGATCTGTATGGCACCTTGTAAACGGGTGCGGCCTAGGGTCGGCGGGTCAATTCCCCAG  
GCGAGTGTCCGGCCA

>*Methylobacterium currus* strain PR1016A

ACCCGGCCTACGGCCGAGTGCCTGATTCGACCCGGCGGGCCCGTGCCCGCCGGGTTTTTCGTGAGC  
GCGTCAAGCTTTCCGGCCGGCGGCTTTAGACGCAAGCGCGGAGGCCCCATTCCGGTTGCCCGCGG  
CCCCGGTCTGGCTTACACGGGCCGTCCTCGATGCCGGCGCGCCCGGAGGCTTCCGGAACCCATCCGG  
GCTGTGCGGCAAAGAGGTGCGCGATGACGGGGTGGGGCGGACCAGTTCTCTGCAACCCATTCTGTG  
AGGCTCAGTGGGCCGAGCAGTCGCAGGAGCGTCACGGGTTCCGGGAAACAGGAACCCGCGACCCCTGGC  
GCATGGCCACCAGAGTTTCCGACGACTCGTCGGACTCCGCTCGTCGGCTCCCGTCGTCTTGGCGGC  
CCGAGGCTCCCGTTGTGGGACGTCCTGAGATCAGCTGCGAGGGGGCCGCGGTTAAGCATTGTGGCCC  
AAGACTAGCGGGACGGCCGATCGGCGGCCCGGCGAGATCGTGGGTCCCAGCACCA

>*Methylobacterium* sp. 17Sr1-1

ACGCGCAGATCCAGAGCCTCGCGTGATTCGACCCGGCGGGCCCGTGCCCGCCGGGTTTTTCGTTGC  
GCCGGTCAAGCTTTCCCGGCCGACGCGTTTAGACGCAAGCGCCGCCCTGCATTCCGGTTGCGACCC  
CGACCCGGTCTGGCTTACACGGACCGTCTCGATGCCGGCGCGCCCGGAGGCTTCCGGAACCCATCC  
GGGCTGTGCGGCAAAGAGGTGCGCGATGACGGGGTGGGGCGGACCAGTTCTCTGCAACCCATTCTGT  
TGAGGCTCAGTGGGCCGAGCAGTCGCAGGAGCGTCACGGGTTCCGGGAAACAGGAACCCGCGACCCCTG  
GCGCATGGCCACCAAACTTCGCCTCTTTCGCCGATCGGCCGCTCCCGTTGCGGGACAGTCCCAGGCG  
AGCGGGCCGAGGCCCGCCGTTAAGCATTGTGCCAGGATCGGCGAAACGGGGCCGGATCGACGGC  
CCCCAGCAAATCGCGGGTCCCAGCACCA

>*Methylobacterium indicum* VL1 DNA

ATCGTCCGCGAGCCGGCCGCGCCTGCGCGCCGGATGACGAGGTGTTTCAACCCGGCGGGCCCTG  
GGCCCGCCGGTTTTATCGTCTCGGTTCGGTCAAGTGCGCCGGCCGCGCGTTGTGACGCAAGCGCCT  
CGGCGGTATTCCGGTTGCCCTCCGGCCCCGTCTGTCTACACGGGCCGTCCTCGATGCCGGCGCGCC  
CGGCGGCTTCCGGAACCCGTCGGGGTGTGGCGCAAAGAGGTGCGGACGACGGGGTGGGGCGGAC  
CAGTTCTCTGCAACCAATCCTGTGAGGCTCAGTGGGCCGAGCAGTCGCGGAGCGTCAGGGTTCCGG  
GGAACAGGAACCCGATCCTGGCGCAAGGCCACCAGATTGCTCCGCCCTCCCGTTGTGGGACGATC  
CGGGTCGGGGGCGGGGAGGCCGCCGTTAAGGCTTATGGCCAAAGAATGTCGGACGGCCGGATCGT  
CGGCTCACACCGATCGTGGGTCCCAGCACCA

>*Methylobacterium aquaticum* strain BG2

AACAGGCCCTAGGCCGATCGCGTGATTCGACCCGGCGGGCCCTGAGCCCCGCCGGTTTTTTCTTGGGG  
CCCGTCAAGCTTTTCCGGCCGGCGCGTTTTGACGCAAGGGCCAGGGCCGATTCCGGTTGCCCCACC  
CGCCCGTCTGGCTTACACGGGCCGTCCTCGATGCCGGCGCGTCCGGAGGCTTCCGGAACCCATCCG  
GCTGTGCGGCAAAGAGGTGCGCGACGACGGGATGGGGCGGACCAGTTCTCTGCAACCCATTCTGT  
GAGGCTCAGTGGGCCGAGCAGTCGCAGGAGCGTCACGGGTTCCGGGAAACAGGAACCCGCGACCCCTGG  
CGCATGGCCACCAGACTTTTTCGGGCATCGCTCCGGGCAATCCGGAATATTGAGCGCCGTCGATCCG  
TCATCCCGTGTTCGCTGTGCGGCGCCGGGATGACGGGGGAGAATTCGAGCGCGCCCGACCCGATC  
GAGCGGCCCCCGGATCGACCCGCTGCTGCCCTCGACCTCGTTCGACCCGCTTTCATCGGAACCTCC  
GTTGTGGGACGACCCGATCCGCGCCGCGAGGGGCCACGCGTTAAGCATTGTGGTCCGATACTGTGCG  
CATGGGCCGACCGACGGCCACCGAGATCACGGGTCCCAGCACCA

>*Methylobacterium aquaticum* strain MA-22A

AGCGCGCCGCGCTGCAGGATGGCGGGATGAATCGACCCGGCGGGCCAAGTCCCCGCCGGGTTTTCT  
GCCCTGGGCTCTTGGCTCTCCGGTCAAGCGCACGTGGCCGGCGGTTTTGACGCAAGGCCGCCG  
CCCGCATCCGGTTGCCCTCCGGCCCGTCTGTCTACACGGACCCTCTCGATGCCGGCGCGCCCCG  
GTGGCTTCCGGAACCCGTCGGGGTGTGCGGCAAAGAGGTGCGCGATGACGGGGTGGGGCGGACCA  
GTTCTCTGCAACTCATTCTGTGAGGCTCAGTGGGCCGAGCAGTCGCCGGAGCGTCAGGGTTCCGGG  
GAACAGGAACCCGATCCTGGCGCAAGGCCACCAGACTTGTCCCGCCGGCCTCGCCCGCTCTCCCG  
ATGTGGACGGCCCGCCCGGACCGTGAAGGCCCGCCGTTAAGTCCTGTGGTCAAGGATGTCGG  
GACGGGCCGGATTGCCGGCCGACACCGATCGTGGGTCTCGACCAGCCA

Supplementary material

---

Hits from Metagenomic data

---

>PJQF01118147.1

GGTAAGCGGGCCTCCGATCGTTTTGGCAATGCATTGCCGGTAGGGCAGCGGGCGTCAGGGCGCGGTTG  
CCC CGCGGCGCGCGGGCCTCTACATCGGCCCTCCCCGCGGCCGATGCGCCCCGATGGTTTTCGCGAGCC  
CTCTCGGGCCTGCGTGGGGCGGGGCCGAGTGACGGGGCGGTGCGGACCAGTTCTCTGCGCCGTT  
CCTGTGACGCTCAGTGGGCCGAGCGGCTGCCGGTGCCTCGGGAGCGCGGGGAACAGGAACCGCGAT  
CCCCGCGCAAGGCCACCTATTCGGCTCCCCTCAGGCCGAAGAGGTACCCGGCCCTGTGCCGGAGT  
GCCGTTAACGGTCTTTCTCAAGGGAAAGCGAACCCTCAGAT

> FUFK01263239.1

ACGCCACCTCCAACAAGACCCTGGAGGAGGCCTGCCGGCGCATCCAGCGCTTCTGCGGCTCGCTGCG  
GTAAGCGGCGCTCCGATCGTTTTGGCAATGCATTGCCGGTAGGGCAGCGGGCGTCAGGGCGCGGTTGC  
CCGCGGCGGCGCGGGCCTCTACATCGGCCCTCCCCGCGGCCGATGCGCCCCGATGGTTTTCGCGAGCCC  
TCTCGGGCCTGCGTGGGGCGGGGCCGAGTGACGGGGCGGTGCGGACCAGTTCTCTGCGCCGTT  
CTGTGACGCTCAGTGGGCCGAGCGGCTGCCGGTGCCTCGGGAGCGCGGGGAACAGGAACCGCGATC  
CCGCGCAAGGCCACCTATTCGGCTCCCCTCAGGCCGAAGAGGTACCCGGCCCTGTGCCGGAGT  
CCGTTAACGGTCTTTCTCAAGGGAAAGC

> FUFK010110014.1

ATGGGGCGCGGCTCCC GCGGGTTTGAATGCGGCGCAGCATGGGTTACACCCGCGCCGTTT CAGAA  
GACCTCATCCGGGAGCCAAATCCTCATGTCCCTGGAATCCGCCGCGCTCGCCC GCGTGAAGCCGTCC  
GCGACCTCGCGGCCGACGCGAAGGCCCGGAGCTGAAAGCCCAGGGCAAGGACGTATCGGCTG  
GCCGCCGCGGAGCCGACTTCGACACGCGGACAACATCAAGGACGCGCCATCAAGGCGATCCCG  
GACGGCAAGACCAAGTACACCAACGTGATGGCATCCC GAGCTGAAGGAGGCGATCTGCGCCAAG  
TTCCACCGGGAGAACGGCCTTTCTACAAGCCAGCCAGATCAACGTCTCGCCGGGCGGCAAGCCGG  
TGATCTGGAACGCCATGATCGCCACGCTGAACCCGCGACGAGGTGATCGTCCCACGCCCTACTG  
GGTCAGTACTGGGACATCGTGTGCTGCGCGGGGGACGCCCGTCCGCTGCCAGCTCAGCCGAC  
GTCGGCTTCAAGTCCAGCCGCGGATCTGGAGCGTGCATCACGCCGAAGACCAAGTGGATCATC  
CTCAACTCGCCGTCGAACCCGTCGGGGCGGGCCTATACGCGCGCCGAGCTGCGCGCCCTGGCCGACG  
TGCTGCTTAAGCACCCGATGTCTGGATCCTGACCGACGACATGTACGAACACCTGGTGTTCGGCGA  
CTTCGAGTTACACCACCATCGCCAGGTCGAGCCCGGCTCTACGACCGCACCCTGACATGAACGGG  
GTCTCNAAGGCCTACGCCATGACCGGCTGGCGCATCGGCTACGCCGCGGGCCCCGAAAGCTCATCA  
AGGCGATGGACTTCGTGCAGGGCCAGCAGACCTCGGGCGCCTCCTCGATCTCGCAATGGGCGGGGT  
GGCGGCGCTCGACGGGACGCAGGAGCACCTCGCCC GTTCAAGGCCGCGTTCCAGGAGCGGCGCGA  
CCTCGTGGTCTCGATGCTCAACCAGTCGAACGGCCTGAAATGCCCGGTGCCGGAGGGCGCGTCTAC  
GTCTATCCGTCCTGCGCCGATCTGATCGGCAAGACCACCGAGACC GGCAAGACCATCGCCACGGACG  
AGGATTTCTGTCACCGGCTGCTCCAGGCGGAGGGTGTGCGCCGGTGCACGGCTCGGCCCTTCGGCCT  
CGCCGCAACCTCGCATCTCCTACGCCACCTCCAACAAGACCCTGGAGGAGGCTGCCCGCGCCT  
CAGCGCTTCTGCGGCTCGTGGGTAAAGCGGCGCTCCGATCGTTTTGGCAATGCATTGCCGGTAGGG  
CAGCGGCGTACGGGCGGGTGGCNGCGGCGNCGGNCCTCTACATCGGCCCTCCCCGCGGCCGAT  
GCGCCGATGGTTTCGCGAGCCCTCTCGGGCCTGCGTGGCGGCGGGGCCGAGTGACGGGGCGGT  
GCGGACCAGTTCTCTGCGCCGTTCTGTGACGCTCAGTGGGCCGAGCGGCTGCCGGTGCCTCGGGAG  
CGCGGGGAACAGGAACCGGATCCC GCGCAAGGCCACCTATTCGGCTCCCCTCAGGCCGAAGAG  
GTCACCCGGCCCTGTGCCGGAGTGCCGTTAACGGTCTTTCTCAAGGGAAAGCGAACCCTCGCGGC  
AATATTTCCAGTTGTCCAACAGAGGTGCTCCATGTCTACGCCGGCAGAGCCCGGCTTCCGCC  
CGCCAGTACCTGCCGGAATCGAAGCTCGAGGATCTCGCCAGCAGCCTGCGCCGGCTACCAATCATC  
GCGCCTCGTGCGCAG

> FUFK010045813.1

ACGGACGAGGATTCGTCACCGAGCTGCTCCAGGCGGAGGGTGTGCGCCGCGGTGCACGGCTCGGCCCT  
TCGGCCTCGGCCGAACCTGCGCATCTCCTACGCCACCTCCAACAAGACCCTGGAGGAGGCCTGCCG  
GCGCATCCAGCGCTTCTGCGGCTCGCTGCGGTAAGCGGCGCTCCGATCGTTTTGGCAATGCATTGCC  
GGTAGGGCAGCGGCGTCAGGGCGGTTGCCCGGGCAGCGGACCTTACATCGGCCCTCCCCG  
CGGCCGATGCGCCC GATGGTTTTCGCGAGCCCTCTCGGGCCTGCGTGGCGGCGGGGCCGAGTGACG  
GGCGGTGCGGACCAGTTCTCTGCGCCGTTCTGTGACGCTCAGTGGGCCGAGCGGCTGCCGGTGC  
TCGGGAGCGCGGGGAACAGGAACCGGATCCC GCGCAAGGCCACCTATTCGGCTCCCCTCAGGCC  
CGAAGAGGTACCCGGCCCTGTGCCGGAGTGCCGTTAACGGTCTTTCTCAAGGGAAAGCGAACCCT  
CGCGGGCAATATTCGCCAGTTGTCCAACAGAGGTGCTCCATGTCTCACGCCGGCAGAGCCCCGCGC  
TTCCGCCCGCCAGTACCTGCCGGAATCGAAGCTCGAGGATCTCGCCAGCAGCCTGCGCCGGCTCGCC  
AATCATCGCGGCTCGTGCAGCAGATCGCCAGCCGATGCTGCTGCGTCTGCTGCGTCTGCGCCCGC  
GGCGCGGAGCAGAAAGACTACGAGGCCGACCTGCGCCAGCGCCTGACCAGCAGCAACCTCGATG  
GGTCCCGCATCGCCTACCTGATGGCCGATGCCGAGCGGGAGATCGCGATCGCCATAACCCGCTGTC  
GGGCTGAGCCGGCGCGGTGGTCCGGAACCCACCGGACATGAACCAAGGGTTGGAGCGCGGCTC



**Table S3. Intergenic regions containing Met1153.**

More conserved region containing Met1153 based on alignment results of all intergenic regions are italicized.

| Hits from Genomic data                                                                                                                                                                                                                                                                                                                                                                                                                                                                                                                                                                                                                                                                                                                                                                                                                                                                                                                                                                                                                                                                                                                                                                                                                                                                                                                                                                                                                                                                                                                                                                                                                                                                                                                                                                                                                                                                                                                                                                                                                                                                                                                                                                                                                                                                                                                                                                                                                                                                                                                                                                                                                                                                                                                                                                                                                                                                                                                                                                                                                                                                                                                                                                                                                                                                                                                                                                                                                                                                                                                                                                                                                                                                                                                                                                                                                                                                                                                                                                                                                                                                                                                                                                                                                                                                                                                                                                                                                                                                                                                                                                                                                                                                                                                                                                                                                                                                                                                                                                                                                                                                                                                                                                                                                                                                                                                                            |
|-------------------------------------------------------------------------------------------------------------------------------------------------------------------------------------------------------------------------------------------------------------------------------------------------------------------------------------------------------------------------------------------------------------------------------------------------------------------------------------------------------------------------------------------------------------------------------------------------------------------------------------------------------------------------------------------------------------------------------------------------------------------------------------------------------------------------------------------------------------------------------------------------------------------------------------------------------------------------------------------------------------------------------------------------------------------------------------------------------------------------------------------------------------------------------------------------------------------------------------------------------------------------------------------------------------------------------------------------------------------------------------------------------------------------------------------------------------------------------------------------------------------------------------------------------------------------------------------------------------------------------------------------------------------------------------------------------------------------------------------------------------------------------------------------------------------------------------------------------------------------------------------------------------------------------------------------------------------------------------------------------------------------------------------------------------------------------------------------------------------------------------------------------------------------------------------------------------------------------------------------------------------------------------------------------------------------------------------------------------------------------------------------------------------------------------------------------------------------------------------------------------------------------------------------------------------------------------------------------------------------------------------------------------------------------------------------------------------------------------------------------------------------------------------------------------------------------------------------------------------------------------------------------------------------------------------------------------------------------------------------------------------------------------------------------------------------------------------------------------------------------------------------------------------------------------------------------------------------------------------------------------------------------------------------------------------------------------------------------------------------------------------------------------------------------------------------------------------------------------------------------------------------------------------------------------------------------------------------------------------------------------------------------------------------------------------------------------------------------------------------------------------------------------------------------------------------------------------------------------------------------------------------------------------------------------------------------------------------------------------------------------------------------------------------------------------------------------------------------------------------------------------------------------------------------------------------------------------------------------------------------------------------------------------------------------------------------------------------------------------------------------------------------------------------------------------------------------------------------------------------------------------------------------------------------------------------------------------------------------------------------------------------------------------------------------------------------------------------------------------------------------------------------------------------------------------------------------------------------------------------------------------------------------------------------------------------------------------------------------------------------------------------------------------------------------------------------------------------------------------------------------------------------------------------------------------------------------------------------------------------------------------------------------------------------------------------------------------------------------------|
| <p>&gt;Methylobacterium extorquens AM1<br/>           ATCGCCTGTTCCGGCGAATGGGGTCAGCCGGTTGGTGGATCAGATTTCGTTCTCCGGCCAATCCCCTCA<br/>           TCCTGAGGTGCCGGAGCGAAGCGGAGGCCTCGAAGGAGGGCTCCAGAAGACGCTGCGATTCTTGGA<br/>           GCCCTCCTTCGAGGCCGCTCCGCGCACCTCAGGATGAGGTAAGTCTGGGAAAACAGTCGAATAG<br/>           AATCTCAAGCGAACGGCAGCATCAGCGGCAGCGCGAGCAGGGCGCCGGCGGCCAGGACGATGGCAT<br/> <u>CGCGCAGGGCGCCGGCCGATCCAGGGCGGGCGTCCGGGATGCTGTGCGTGGGTGTCTTCGAAAAACGT</u><br/> <u>CATGGTCTGTCTCCTGTCCGTTTCGATGGCCCCGATATTACGGCGCCCGCCTTTCCCGACAGGGACGG</u><br/>           TTGCGGTACGATTTCAACGAACTGTCCGGGACGAGCACCAGATACAGTTCGGAGGGACAGCCA</p> <p>&gt;Methylobacterium zatmanii strain PSBB041<br/>           CATGGAGCGGGCGAAGGGCTGTTTCGAGGCGAACTGCACCGCCGGTGTATCGCTGTTCCGGCGAATG<br/>           GGGTCAGCCGGTTGGTGGATCAGATTTCGCTCCTCCGGCCAATCCCCTCATCTGAGGTGCCGGAGCGA<br/>           AGCGGAGGCCTGGAAGGAGGGCTCCAGAAGACGCTGCGATTCTGGAGCCCTCCTTCGAGGCCGCTC<br/>           CGCGGCACCTCAGGATGAGGTAAGTCTGGGAAAACAGTCGAATAGAATCTCAGGGCGAACGGCAC<br/> <u>GATCAGCGGCAGCGGAGCAGGGCGCCGGCGGAGGACGATGGCATCGCGCAGGGCGCCGGCCGAT</u><br/> <u>CCAGCGCGGGGATCGGGATGCTGTGCGTGGGTGCTTCAAAAAACGTATGGTCTGTCTCCTGTCCGG</u><br/> <u>TTCGATGGCCCCGATATGACGGCGCCGCGCTTTCCCGACAGGGACGGTTGCGGTACGATTTCAACGA</u><br/>           ACTGTCCGGGACGAGCACCAGTACAGTTCGGAGGGACAGCCATGACGGTGACGGTTCGCGGAACCGGT<br/>           CCTCTCGCGGGTCGAGACGGTGATG</p> <p>&gt;Methylobacterium extorquens strain TK 0001<br/>           GAGCGAAGCGGAGGCCTGGAAGGAGGGCTCCAGAAGACGCTGCGATTCTGGAGCCCTCCTTCGAGG<br/>           CCGTCCGCGGCACCTCAGGATGAGGTAAGTCTGGGAAAACAGTCGAATAGAATCTCAGGGCGAAC<br/> <u>GGCAGCATCAGCGGCAGCGGAGCAGGGCGCCGGCGGAGGACGATGGCATCGCGCAGGGCGCCGG</u><br/> <u>CCGATCCAGGGCGCGGATCGGGATGCTGTGCGTGGGTGCTTCAAAAAACGTATGGTCTGTCTCCT</u><br/> <u>GTCGGTTCGATGGCCCCGATATGACGGCGCCGCGCTTTCCCGACAGGGACGGTTGCGGTACGATTTCA</u><br/>           AACGAACTGTCCGGGACGAGCACCAGTACAGTTCGGAGTGACAGCCATGACGGTGACGGTTCGCGGA<br/>           ACCGGTCTCTCGCGGGTCGAGACGGTGATGCGGGCCATCGAGGCGCGGATCGAGGGCCGGGCGCTC<br/>           GGCCCCGGCGCGCGGTGCCCTCGGTGCGGAGCCTCGCCGACA</p> <p>&gt;METHYLORUBRUM EXTORQUENS STRAIN PSBB040<br/>           TGGTCCCCCTCCGAACGTACCGATGCTCGTCCCGGACAGTTCGTTGAAATCGTACCGCAACCGTCC<br/>           CTGTCCGGAAAGCGGCGCCGTATATCGGGCCATCGAACCAGACAGGAGACAGACCATGACGTT<br/> <u>TTTCGAAGACACCCACGCCAGCATCCCCAGCCTCGCGCTGGATCGGTCCGGCGCCTGCGCGATGCC</u><br/> <u>ATCGTCTCCGCGCCGGCGCCCTGCTCGCGTCCCGCTGATCGTGCCGTTCCGCTGAGATTCTATTCCG</u><br/> <u>ACTGGTTTTCCAGGACTTACCTCATCCTGAGATGCCGCGGAGCGGCCTCGAAGGAGGGCTCCAGGA</u><br/>           ATCGCAGCGTCTTCTGGAGCCCTCCTTCGAGGCCTCCGTTTCGCTCCGGCACCTCAGGATGAGGGGAT<br/>           TGGCCGGAGGAGCGAATCTGATCCACCAACCGGCTGACCCATTTCGCCGAACACGCGATCAGCCGGC<br/>           GGTGCAAGTTCGCTCGAACAGCGCCTTCGCCCTCCTATGGCCCGGAACCGCCGACCGGAGCCCGGG<br/>           CTGCGCAGTTCGCGCCCTCGGGCAGACGCCCCAGGAAGGGTTCGGACAGGTCCGCCACGAACGGCC<br/>           GGGGCCCGGTATAGGCGCCATGCGGTTGCGCAGATCGAACCCTGCCGACAAGGCCCGCGCCCGGCC<br/>           GATCCGACGGCCGGCCACCTTCGCCTCGGGTTCGCGCATCTGCCGCTCGATCAGGCTCAGCGCGGTCC<br/>           GCGCCGCTCCGCCCGACGCCGGCTCCGAACCCTCACGACGGTCTGAGCGCCCGCCGACCCCGC<br/>           GCCGGCAGGATCAGGAAGGCCCGGAGGGCGGTCTTGCGCAGGCGCAT</p> <p>&gt;Methylobacterium extorquens CM4<br/>           GAGGCGAAGTGCACCGCCGGTGTATCGCTGTTCCGGCGAATGGGGTCAGCCGGTTGGTGGATCAGAT<br/>           TCGTCTCCTCCGGCCAATCCCCTCATCTGAGGTGCCGGAGCGAAGCGGAGGCCTCGAAGGAGGGCTC<br/>           CAGAAGACGCTGCGATTCTCGGAGCCCTCCTTCGAGGCCGCTCCGCGGCACCTCAGGATGAGGTAAG<br/>           TCCTGGGAAAACAGTCGAATAGAATCTCAGGGCGAACGGCAGCATCAGCGGTAGCGCGAGCAGGGC<br/> <u>GCCGGCGCCAGGACGATGGCATCGCGCAGGGCGCCGGCCGATCCAGGGCGGGGACCAGGATGCTG</u><br/> <u>TGCTTGGGTGTCTTCAAAAAACGTATGGTCTGTCTCCTGTCCGTTTCGATGGCCCCGATATGACGGCG</u><br/> <u>CCGCGCTTTCCCGACAGGGACGGTTGCGGTACGATTTCAACGAACTGTCCGGGACGAGCGCTGGTA</u><br/>           CAGTTCGGAGAGACAGTACGAGTTCGCGGAACCGGT</p> <p>&gt;Methylobacterium extorquens str. DM4 chromosome<br/>           GAGGCGAAGTGCACCGCCGGTGTATCGCTGTTCCGGCGAATGGGGTCAGCCGGTTGGTGGATCAGAT<br/>           TCGTCTCCTCCGGCCAATCCCCTCATCTGAGGTGCCGGAGCGAAGCGGAGACCTCGAAGGAGGGCTC<br/>           CAGAAGACGCTGCGATCTCTGGAGCCCTCCTTCGAGGCCGCTCCGCGGCACCTTAGGATGAGGTAAG<br/>           TCCTGGGAAAACCCAGTCGAAGAGCCGCTCAGGGCGAACGGCAGCATCAGCGGTAGCGCGAGCAGGGC<br/> <u>GCCGGCGCCAGGACGATGGCATCGCGCAGGGCGCCGGCCGATCCAGGGCGGGGACCAGGATGCTG</u><br/> <u>TGCTTGGGTGTCTTCAAAAAACGTATGGTCTGTCTCCTGTCCGTTTCGATGGCCCCGATATGACGGCG</u><br/> <u>CCGCGCTTTCCCGACAGGGACGGTTGCGGTACGATTTCAACGAACTGTCCGGGACGAGCGCTGGTA</u><br/>           CAGTTCGGAGAGACAGTACGAGTTCGCGGAACCGGT</p> <p>&gt;Methylobacterium extorquens str. DM4 chromosome<br/>           GAGGCGAAGTGCACCGCCGGTGTATCGCTGTTCCGGCGAATGGGGTCAGCCGGTTGGTGGATCAGAT<br/>           TCGTCTCCTCCGGCCAATCCCCTCATCTGAGGTGCCGGAGCGAAGCGGAGACCTCGAAGGAGGGCTC<br/>           CAGAAGACGCTGCGATCTCTGGAGCCCTCCTTCGAGGCCGCTCCGCGGCACCTTAGGATGAGGTAAG<br/>           TCCTGGGAAAACCCAGTCGAAGAGCCGCTCAGGGCGAACGGCAGCATCAGCGGCAGCGCGAGCAGG<br/> <u>GCGCCAGCGCGAGGACGATGGCATCGCGCAGGGCGCCGGCCGATCCAGGGCGGGGCGTCCGGGATGC</u><br/> <u>TGTGCGTGGGTGTCTTCAAAAAACGTATGGTCTGTCTCCTGTCCGTTTCGATGGCCCCGATATGACGG</u><br/> <u>CGCCGCGCTTTCCCGACAGGGACGGTTGCGGTACGATTTCAACGAACTGTCCGGGACAAGCGTCCG</u><br/>           TACAGTTCGGAGGGACATCCATGACGGTTCGCGGAACCGGT</p> |

## Supplementary material

>Methylobacterium sp. AMS5

ATCGCGCAGAGCCGAATCCGGCCCCGATCGCGTCAGCCCCGGCGTCTCAAGGTCCTTGCTTTTCGCACCGT  
CGCTTTCCGAAAGCCGGCGACCGCCTTTCGGGGCGATGCCCTAGGGCAACGGCACGATCAGCGGCAG  
GGCGAGCACGGCGCCGGCGGCCAGGACGATGGCATCGCGCAGGCGCCGGCCGATCCAGGGCGGGG  
GCCGGGATGCGGCGCGTGGGTGTCTTCAAAAAACGTCATGGTCTGTCTCTATCGGGCTCGATGGCAC  
CGATATGACGGCGCCGCGCTTCCCGACAGGGACGGTTGCGGTACGATTTCAAGAAGTGTCCGGG  
ACGAGCGCCGGTACAGTTCGAAGGGACAGCCA

>Methylobacterium populi BJ001

ACGGCCTCCTTGCGACTCGGCTCAGCCAGCGAGTGGCTCAGATCCACTCGTTCAGCCAATCCCTCAC  
CTGAGGTGACGGAGCGAAGCGGAGCCCTCCTTCGAGGCCCTCCGCGGCACCTCCGAAATATGAGG  
TCCTGGGACAAGCCGGCTGATCGTCCCTCAAGCGAACGGCACGATCAGCGGCAGGGCCAGCGCGCG  
CCGGCGCCAGGACGATGGCATCGCGCAGGCGCGCCGATCCAGGCGCGGGCGCCGGCCGGCG  
GCAAGGGCGTCTTCTGCTTGGGTGTCTTCTGAAAGCGTCATGATCCGTCTCCCGTCTCTCGGTGCTCC  
GATATGACGGCGGCACCGCTTCCCGACAGGGACGGTTGCGGTACGATTTCAAGGAAGTGTCCGGGA  
CATGGTTCGGTACAGTTCGGAGGGACAGTCA

>Methylorubrum populi strain YC-XJ1

ACGGCCTGCTTGCGACTCGACTCAGCCAGCGCGTGGCTCAGATCCACTCGTTCAGCCAATCCCTCAC  
CTGAGGTGACGGAGCGAAGCGGAGCCCTCCGTCGAGGCCGCTCCGCGGCACCTCAGGAACCATGAGG  
TCCTGGCACAAGCCGGCTGATCGTCCCTCAAGCGAACGGCACGATCAGCGGCAGGGCCAGCGCGCG  
CCGGCGCCAGGACGATGGCGTGCAGGCGCGCCGATCCAGGCGCGGGTGCCTGGCCGGCAT  
GCAGGGGCGTCTTCTGCTTGGGTGTCTTCTGAAAGCGTCATGATCCGTCTCCCGTCTCTCGGTGCTCC  
GATATGACGGCGGCACCGCTTCCCGACAGGGACGGTTGCGGTACGATTTCAAGGAAGTGTCCGGGA  
CATGGTTCGGTACAGTTCGGAGAGACAGTCA

>Methylobacterium sp. NI91

AGTCGGCTCAGGCGAACGGCACGATCAGCGGCAGCGCCAGCACGGCGCCGAGGGCCAGGACGAGGA  
CGTCCCGCAGGCGCCGGCCGAGCCAGGCTCGGGTGCCGGGTGGCGCGAATGGGTGTCTTCTGAAAG  
CGTCATGGTCTGTCTCCCGTCTTTCGGTGGCTCCGATATGAGACGATTGCCGCTTCTCCGACAGGGAC  
GGTTGCGGTACGATTTCCGACGAAGTGTCCAGGACGAACGCCGGTACAGTTCGGAGGGACAATCA

>Methylobacterium sp. CLZ

AGTCGGCTCAGGCGAACGGCACGATCAGCGGCAGCGCCAGCACGGCGCCGAGGGCCAGGACGAGGA  
CGTCCCGCAGGCGCCGGCCGAGCCAGGCTCGGGTGCCGGGTGGCGCGAATGGGTGTCTTCTGAAAG  
CGTCATGGTCTGTCTCCCGTCTTTCGGTGGCTCCGATATGAGACGATTGCCGCTTCTCCGACAGGGAC  
GGTTGCGGTACGATTTCCGACGAAGTGTCCAGGACGAACGCCGGTACAGTTCGGAGGGACAATCA

>Methylobacterium sp. DM1

AGTCGGCTCAGGCGAACGGCACGATCAGCGGCAGGGCTAGCACGGCGCCGAGGGCCAGAACGAGGA  
CGTCCCGCAGGCGCCGGCCGAGCCAGGCTCGGGTGCCGGGTGGCGCGAATGGGTGTCTTCTGAAAG  
CGTCATGGTCTGTCTCCCGTCTTTCGGTGGCTCCGATATGAGACGATTGCCGCTTCTCCGACAGGGAC  
GGTTGCGGTACGATTTGACGAAGTGTCCAGGACGAGCGCCGGTACAGTTCGGAGGGACAATCA

>Methylorubrum sp. B1-46

AGTCGGCTCAGGCGAACGGCACGATCAGCGGCAGGGCCAGGAGAGCGCCGAGGGTCAAACGAGGA  
GGTCGCGCAGGCGCCGGCCGAGCCAGGCACCGGTGCCGGGTGGCGCGAATGGGTGTCTTCTGAAAG  
CGTCATGGTCTAGTCTCCCGTCTTTCGGTGGCTCCGATATGAGGGGATCGCCGCTTCTCCGACAGGGAC  
GGTTGAGTACGATTTCCGAGGAAGTGTCCGGGGCATGCGCCGGTACAGTTCGGAGGAACAGTCA

>Methylobacterium populi DNA

AGCGGCCTCAGGCGAACGGCACGATCAGCGGCAGGGCGAGCGCGGCCCGGCCAGGACGATGG  
CGTCGCGCAAGCGCCGGCCGATCCAGGCACGGGCGCGGGACGGCGCGCGGGTGTCTTCTGAAAG  
CGTCATGGTCTGTCTCCCATCTGACGGTCGCCCCGATATGCCGGCGGCGCCGCTTCCCGACAGGGAC  
AGTTGCAGTACGATTTATCGAAGTGTCCGGGACAAGCGTCGGTACAGTTCGGAGGAACAGTCA

**Table S4. RNAcode results for intergenic region containing Met2624.**

| Frame | Amino acids<br>(aa) |      |    | Nucleotide |     | Score | P     |
|-------|---------------------|------|----|------------|-----|-------|-------|
|       | Length              | From | to | Start      | End |       |       |
| -2    | 29                  | 3    | 31 | 8          | 94  | 17.62 | 0.305 |
| +2    | 20                  | 1    | 20 | 2          | 61  | 16.03 | 0.439 |
| -3    | 9                   | 54   | 62 | 162        | 188 | 11.46 | 0.890 |
| +3    | 16                  | 34   | 49 | 102        | 149 | 10.18 | 0.959 |
| -1    | 9                   | 34   | 42 | 100        | 126 | 10.05 | 0.964 |
| +1    | 8                   | 21   | 28 | 61         | 84  | 7.94  | 0.998 |
| +2    | 4                   | 23   | 26 | 69         | 80  | 7.14  | 1     |
| -2    | 14                  | 39   | 52 | 116        | 157 | 7.10  | 1     |
| +3    | 3                   | 5    | 7  | 15         | 23  | 6.45  | 1     |
| +2    | 14                  | 47   | 60 | 140        | 181 | 6.21  | 1     |
| -1    | 3                   | 5    | 7  | 15         | 23  | 5.71  | 1     |

**Table S5: Optical density at which samples were taken for RNA-seq**

| Condition                    |   | Optical density (600 nm) |
|------------------------------|---|--------------------------|
|                              | 1 | 3.206                    |
| Wild type, controlled pH     | 2 | 3.12                     |
|                              | 3 | 3.125                    |
|                              | 1 | 2.968                    |
| Triple mutant, controlled pH | 2 | 2.902                    |
|                              | 3 | 2.921                    |
|                              | 1 | 2.958                    |
| Triple mutant                | 2 | 3.266                    |
|                              | 3 | 3.207                    |

Figures

**A**

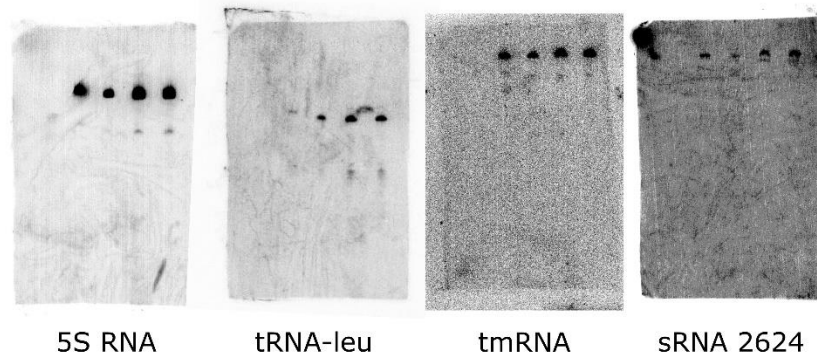

**B**

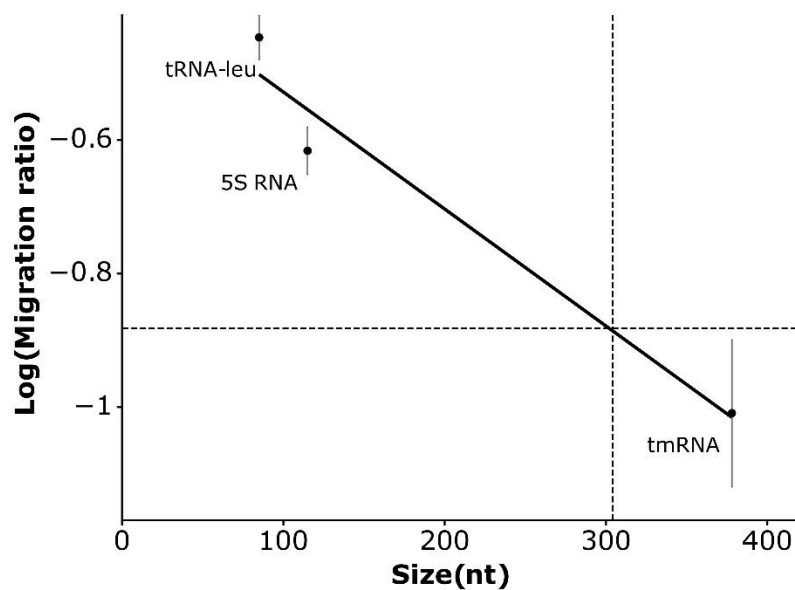

**Figure S1. Size estimation of candidate sRNA2624 based on known RNA.** Hybridization of probes for controlled RNA is observed with radioactivity labelling. Since the size of these controlled RNAs are known (5S RNA, 115 nt; tRNA-leu, 85 nt and tmRNA; 378 nt), their migration ratio in a membrane can be measured and graphed to estimate the size of candidate RNAs such as sRNA2624 (B). All probes were tested on three different membranes.

Supplementary material

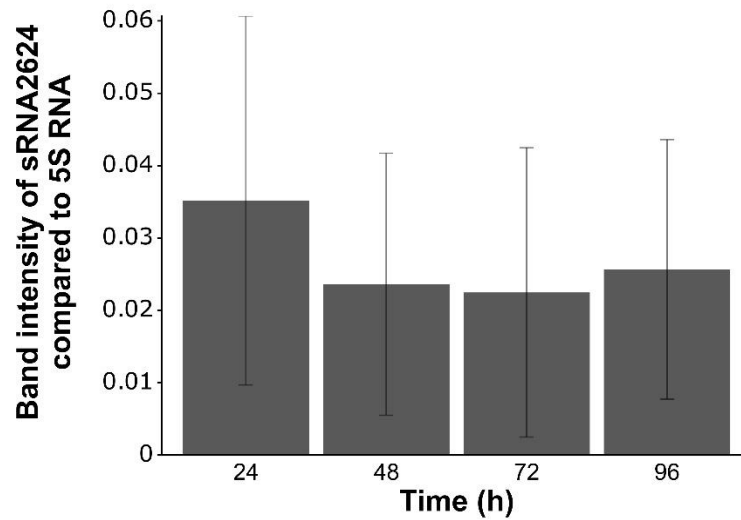

**Figure S2. Expression of sRNA2624 over the growth of *M. extorquens*.** Probes for sRNA 2624 were tested on three different membrane and normalized to the band intensity of a control RNA, 5S RNA.

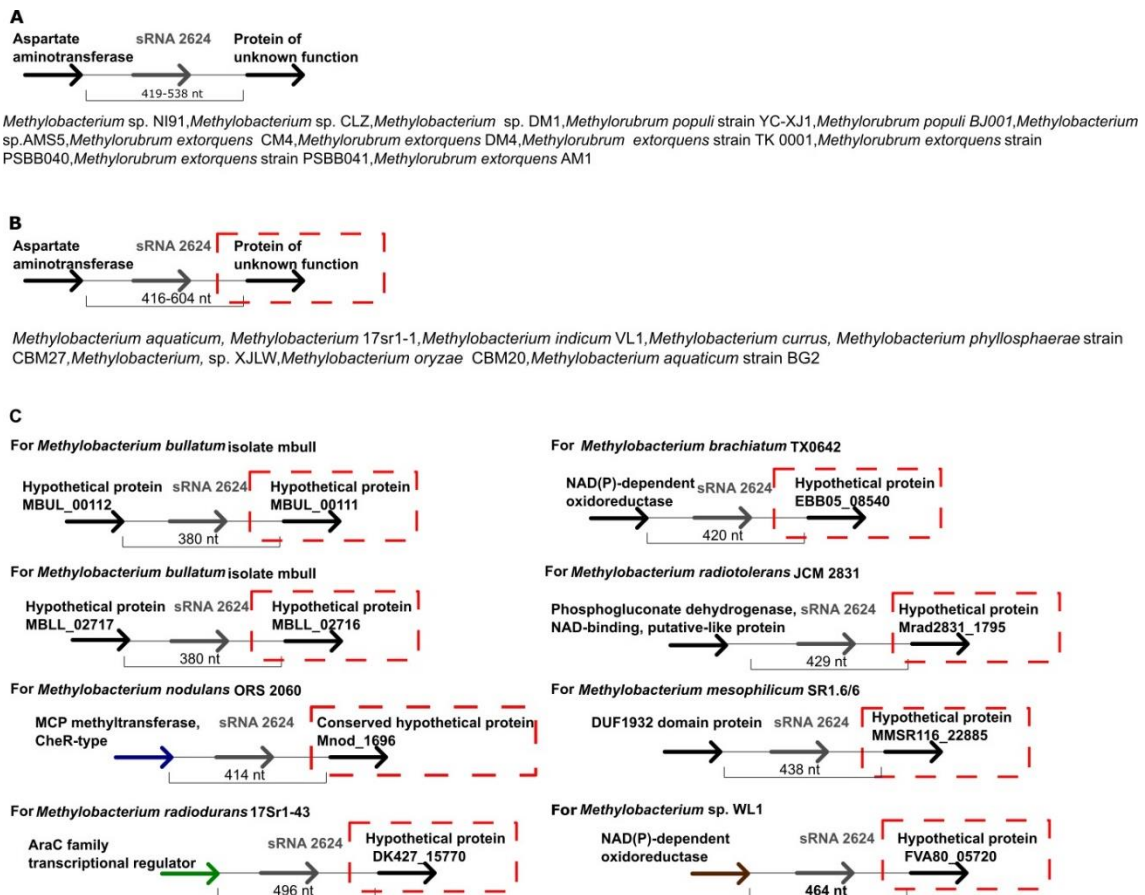

**Figure S3. Genomic context of Met2624.** Results are based on NCBI BLASTn [37]. All bacteria listed in (A) have an aspartate aminotransferase in 5' of Met2624 and a protein of unknown function of the same family in 3'. Bacteria listed in (B) also have an aspartate aminotransferase upstream of the sRNA candidate, but it is followed by a different protein

## Supplementary material

of unknown function. Bacteria listed in (C) have the same protein of unknown function encoded downstream of Met2624 in their genome as those listed in (B) represented by a dashed red box, but the protein upstream differs. Proteins that are identical are represented by the same color in (C) (black, blue, brown, or green). Met2624 is encoded only in the family Methylobacteriaceae.

```
Sequences: 34
Columns: 200
Reading direction: forward
Mean pairwise identity: 83.71
Shannon entropy: 0.37902
G+C content: 0.72183
Mean single sequence MFE: -111.29
Consensus MFE: -73.21
Energy contribution: -68.23
Covariance contribution: -4.98
Combinations/Pair: 1.71
Mean z-score: -2.03
Structure conservation index: 0.66
Background model: dinucleotide
Decision model: sequence based alignment quality
SVM decision value: 1.47
SVM RNA-class probability: 0.941197
Prediction: RNA
```

**Figure S4. RNAz results for intergenic regions containing Met2624.** The program suggested Met2624 is a functional RNA.

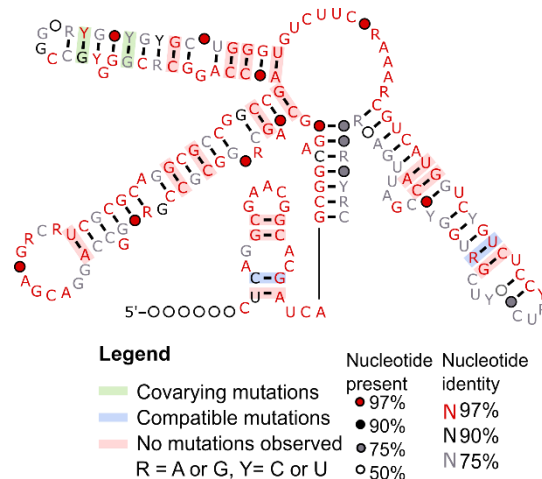

**Figure S5. Secondary structure for Met1153.** The structure was drawn by the program R2R [53]. Taken individually, none of the indicated covarying base pairs are considered statistically significant according to R-scape [44].

## Supplementary material

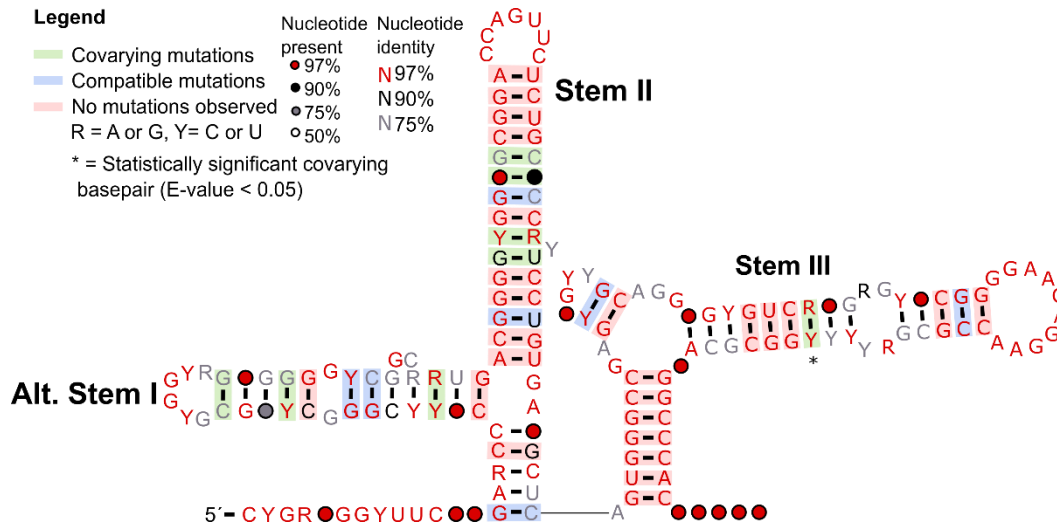

**Figure S6. Alternative secondary structure for Met2624.** The structure was drawn by the program R2R using an alternative Stockholm alignment [53]. Taken individually, a base pair in stem III is considered statistically significant according to R-scape [44]. While the structure pictured in Figure 5 fits the conserved region and the experimentally estimated 5' and 3' ends, several alternative alignments (and corresponding structure predictions) with slightly different 5' and 3' ends were performed (data not shown). For several of these structures as well as for the structure pictured in Figure S6, it can be noted that stems II and III are identical to that of Figure 5. This contrasts with the “Alternative stem I” which is completely different from Stem I in Figure 5 and also appears less likely to form, given that the latter has more conserved basepairs, covariations and compatible mutations.

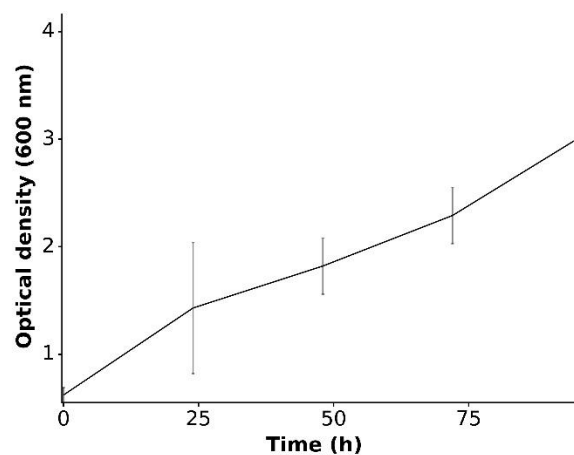

**Figure S7. Growth curve of *M. extorquens* ATCC55366 for Northern Blot Analysis.** It was cultivated with 1% methanol as the sole source of carbon in tri-replicates. The optical density (600 nm) was measured every 24 hours for four consecutive days.
